# Supplementary material for: Preparation of a disulfide-linked precipitative soluble support for solution-phase synthesis of trimeric oligodeoxyribonucleotide 3´-(2-chlorophenylphosphate) building blocks
Source: publisher site journal article supplement (doi:10.3762/bjoc.11.171), 2015-09-07
Supplement: Additional file 1 [file 1860-5397-11-171-S1.pdf]

# Supporting Information

for

## Preparation of a disulfide linked precipitative soluble support for solution-phase synthesis of trimeric oligodeoxyribonucleotide 3'-(2-chlorophenylphosphate) building blocks

Amit M. Jabgunde<sup>1,2\*</sup>, Alejandro Gimenez Molina<sup>1</sup>, Pasi Virta<sup>1</sup> and Harri Lönnberg<sup>1</sup>

Address: <sup>1</sup>Department of Chemistry, University of Turku, FIN-20014 Turku, Finland and <sup>2</sup>current address: Rega Institute for Medical Research, Minderbroedersstraat 10, KU Leuven, 3000- Leuven, Belgium

Email: Amit M. Jabgunde - amit.jabgunde@gmail.com

\*Corresponding author

**<sup>1</sup>H NMR, <sup>13</sup>C NMR and DEPT spectra for 2, and 3, <sup>31</sup>P NMR spectra of 10, mass spectra for 2, 3, 7a–10**

### Contents

|                                                                          |     |
|--------------------------------------------------------------------------|-----|
| <b>Figure S1.</b> <sup>1</sup> H and <sup>13</sup> C spectra of <b>2</b> | S2  |
| <b>Figure S2.</b> DEPT spectra of <b>2</b>                               | S3  |
| <b>Figure S3.</b> <sup>1</sup> H and <sup>13</sup> C spectra of <b>3</b> | S4  |
| <b>Figure S4.</b> DEPT spectra of <b>3</b>                               | S5  |
| <b>Figure S5.</b> <sup>31</sup> P spectra of <b>10</b>                   | S6  |
| <b>Figure S6.</b> MS (ESI) spectrum of <b>2</b>                          | S7  |
| <b>Figure S7.</b> MS (ESI) spectrum of <b>3</b>                          | S8  |
| <b>Figure S8.</b> MS (ESI) spectrum of <b>7A</b>                         | S9  |
| <b>Figure S9.</b> MS (ESI) spectrum of <b>7B</b>                         | S10 |
| <b>Figure S10.</b> MS (ESI) spectrum of <b>8A</b>                        | S11 |
| <b>Figure S11.</b> MS (ESI) spectrum of <b>8B</b>                        | S12 |
| <b>Figure S12.</b> MS (ESI) spectrum of <b>9</b>                         | S13 |
| <b>Figure S13.</b> MS (ESI) spectrum of <b>10</b>                        | S14 |

SpinWorks 3: Compound 2,  $^1\text{H}$  NMR,  $\text{CDCl}_3$ , 400 MHz

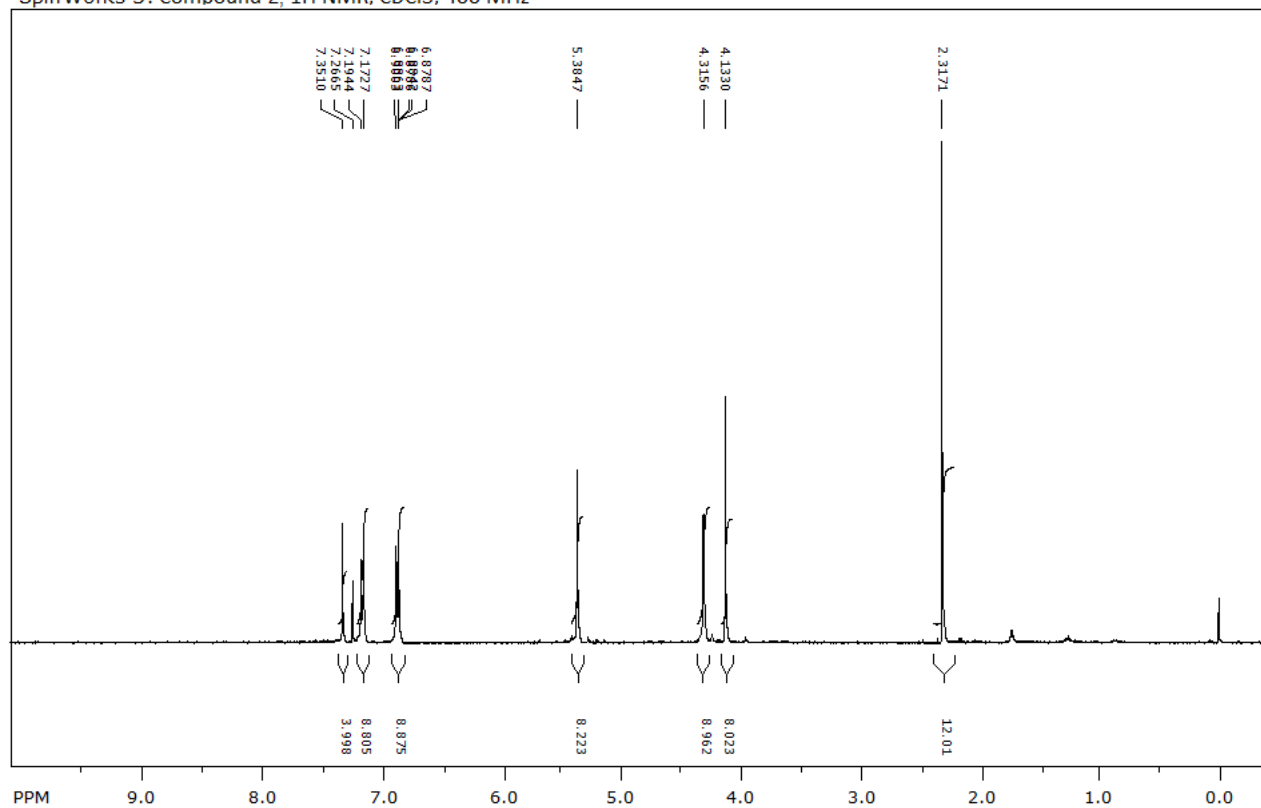

SpinWorks 3: Compound 2,  $^{13}\text{C}$  NMR,  $\text{CDCl}_3$ , 125 MHz

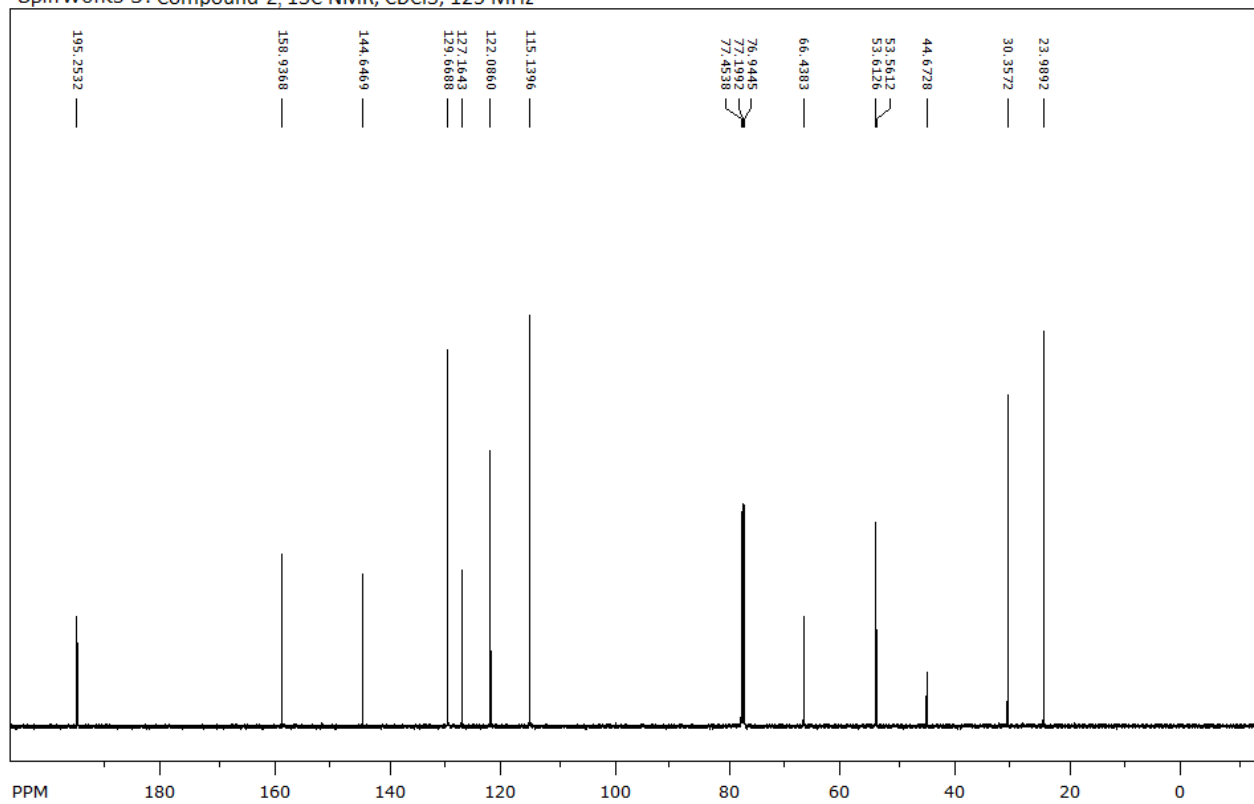

Figure S1:  $^1\text{H}$  and  $^{13}\text{C}$  spectra of 2.

SpinWorks 3: Compound 2, DEPT, CDCl<sub>3</sub>, 100 MHz

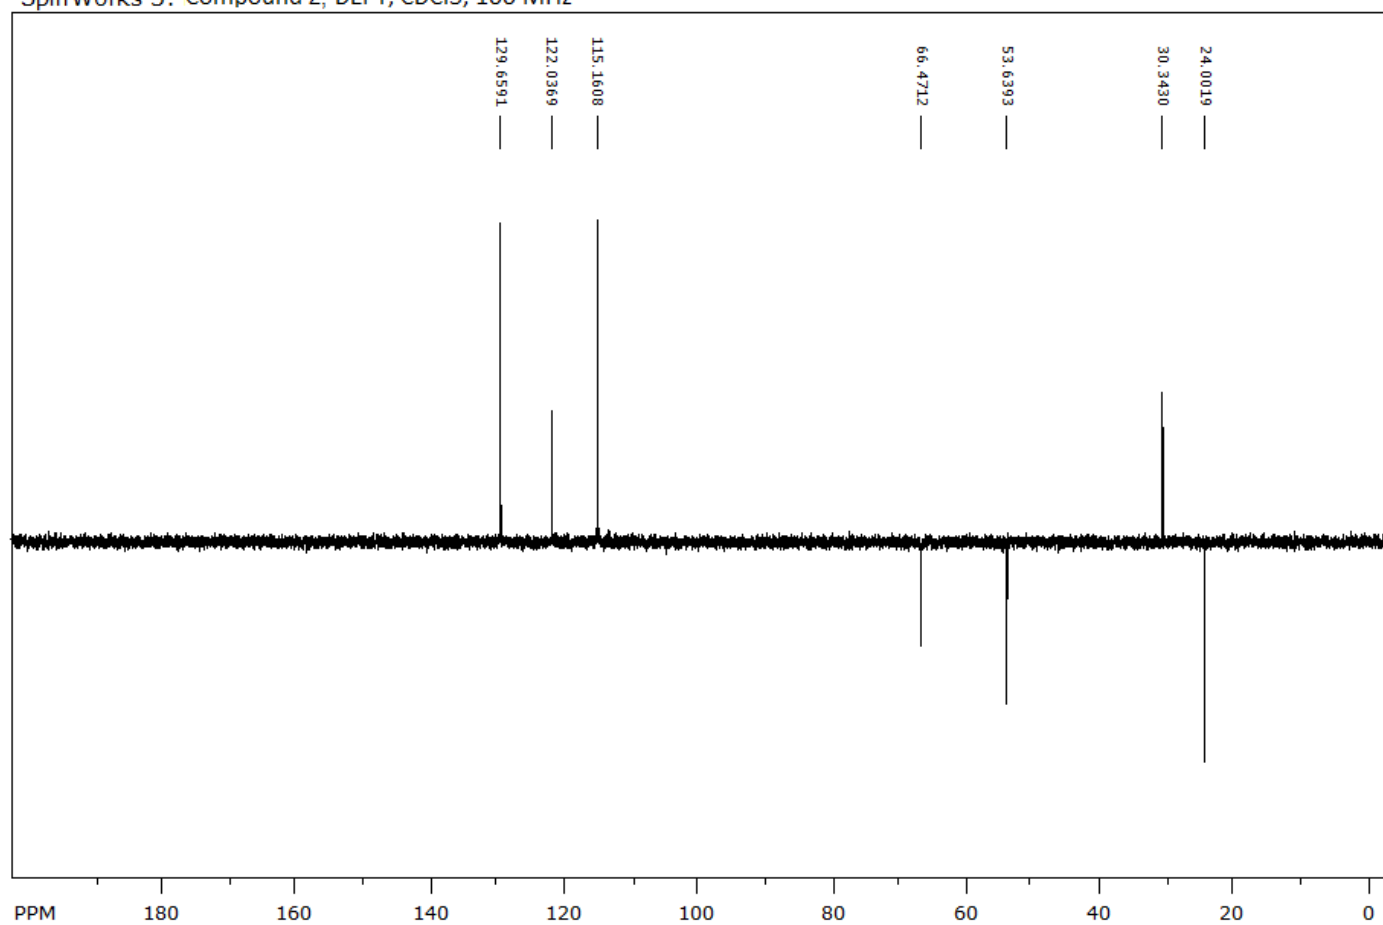

**Figure S2:** DEPT spectra of **2**.

SpinWorks 3: Compound 3,  $^1\text{H}$  NMR,  $\text{CDCl}_3$ , 500 MHz

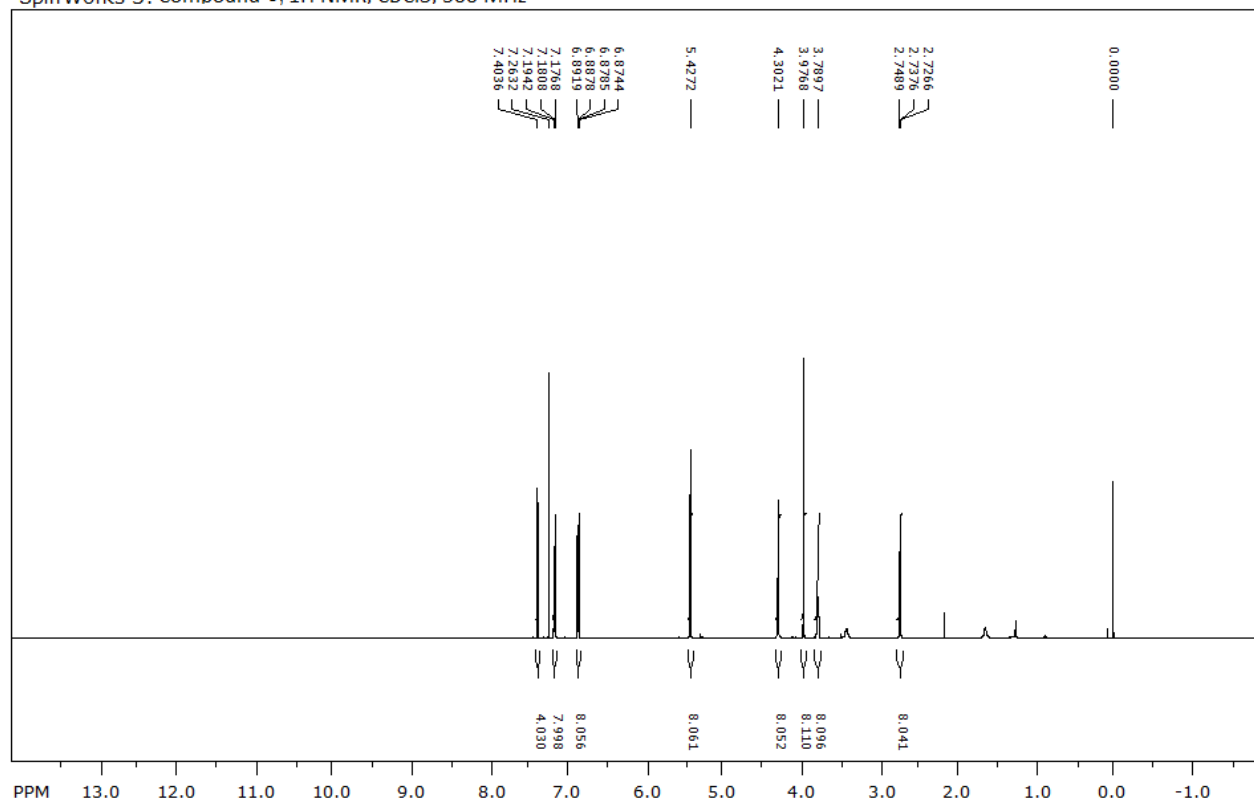

SpinWorks 3: Compound 3,  $^{13}\text{C}$  NMR,  $\text{CDCl}_3$ , 100 MHz

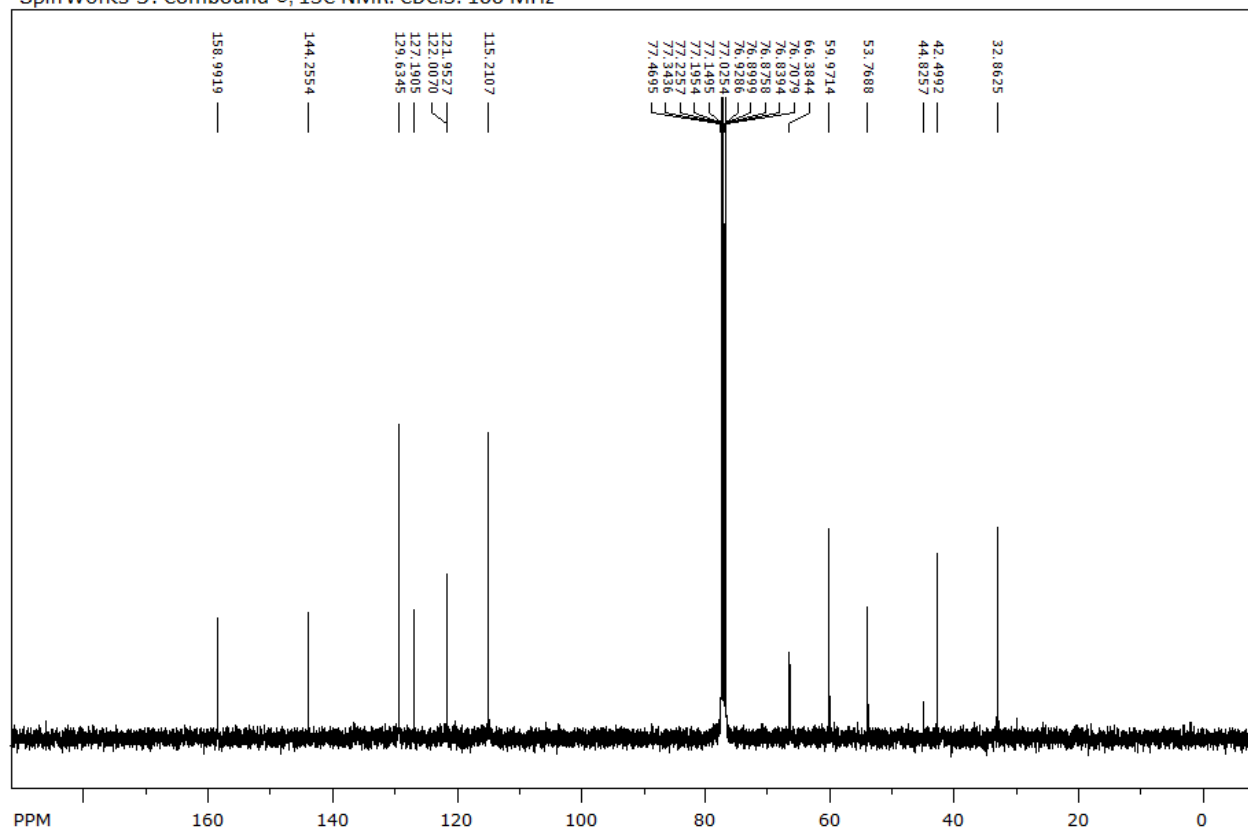

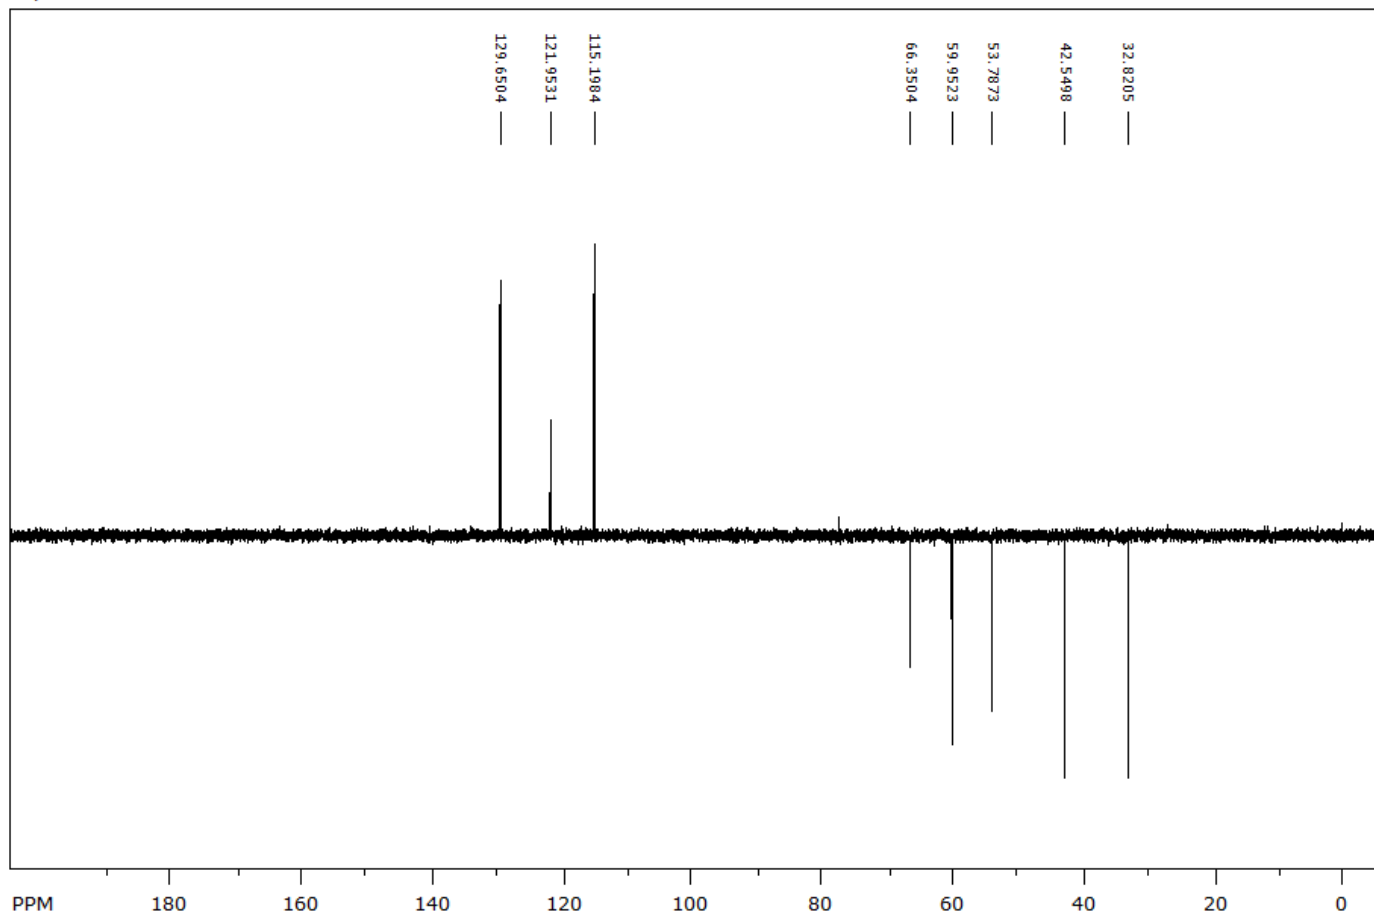

Figure S4: DEPT spectra of 3.

Compound **10**, P31 NMR, CDCl<sub>3</sub>, 162 MHz

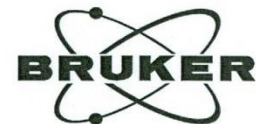

Current Data Parameters  
NAME AJ-TCG-17062014  
EXPNO 2  
PROCNO 1

F2 - Acquisition Parameters  
Date\_ 20140617  
Time 11.33  
INSTRUM av400  
PROBHD 5 mm BBO BB-1H  
PULPROG zgpg30  
TD 65536  
SOLVENT Acetone  
NS 384  
DS 4  
SWH 64724.918 Hz  
FIDRES 0.987624 Hz  
AQ 0.5063233 sec  
RG 20642.5  
DW 7.725 usec  
DE 6.00 usec  
TE 295.0 K  
D1 2.00000000 sec  
d11 0.03000000 sec  
DELTA 1.89999998 sec  
MCREST 0.00000000 sec  
MCWRK 0.01500000 sec

===== CHANNEL f1 =====  
NUC1 31P  
P1 6.90 usec  
PL1 1.00 dB  
SFO1 161.8298371 MHz

===== CHANNEL f2 =====  
CPDPRG2 waltz16  
NUC2 1H  
PCPD2 80.00 usec  
PL2 -1.00 dB  
PL12 18.00 dB  
PL13 18.00 dB  
SFO2 399.7515990 MHz

F2 - Processing parameters  
SI 32768  
SF 161.8217460 MHz  
WDW EM  
SSB 0  
LB 1.00 Hz  
GB 0  
PC 1.40

6.53  
6.56  
6.73  
6.82  
6.89  
7.05  
7.20  
7.52  
7.78  
7.80  
8.02  
8.05

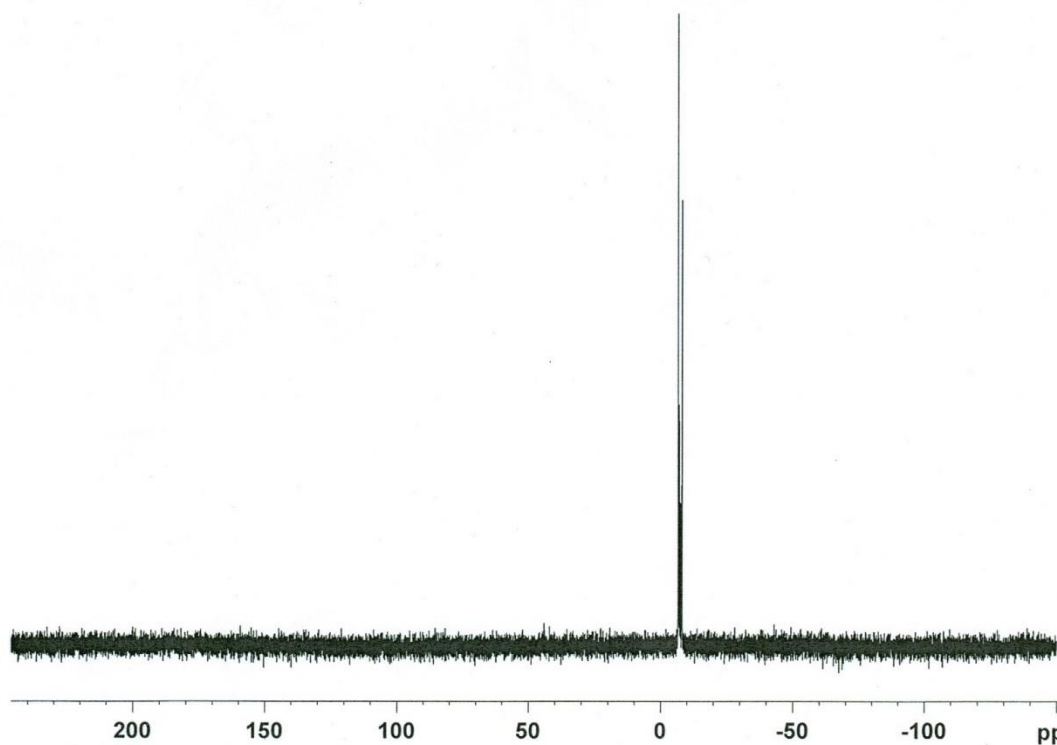

Figure S5: <sup>31</sup>P spectra of **10**.

# Generic Display Report

## Analysis Info

Analysis Name D:\Data\Amit\Jan-Mar 2013\AJ-Click-Fin- pos19.0313.d  
Method tune\_wide pos 12082011working.m  
Sample Name AJ-Click-Fin- pos19.0313  
Comment

Acquisition Date 3/19/2013 2:41:08 PM

Operator Bruker07  
Instrument micrOTOF-Q

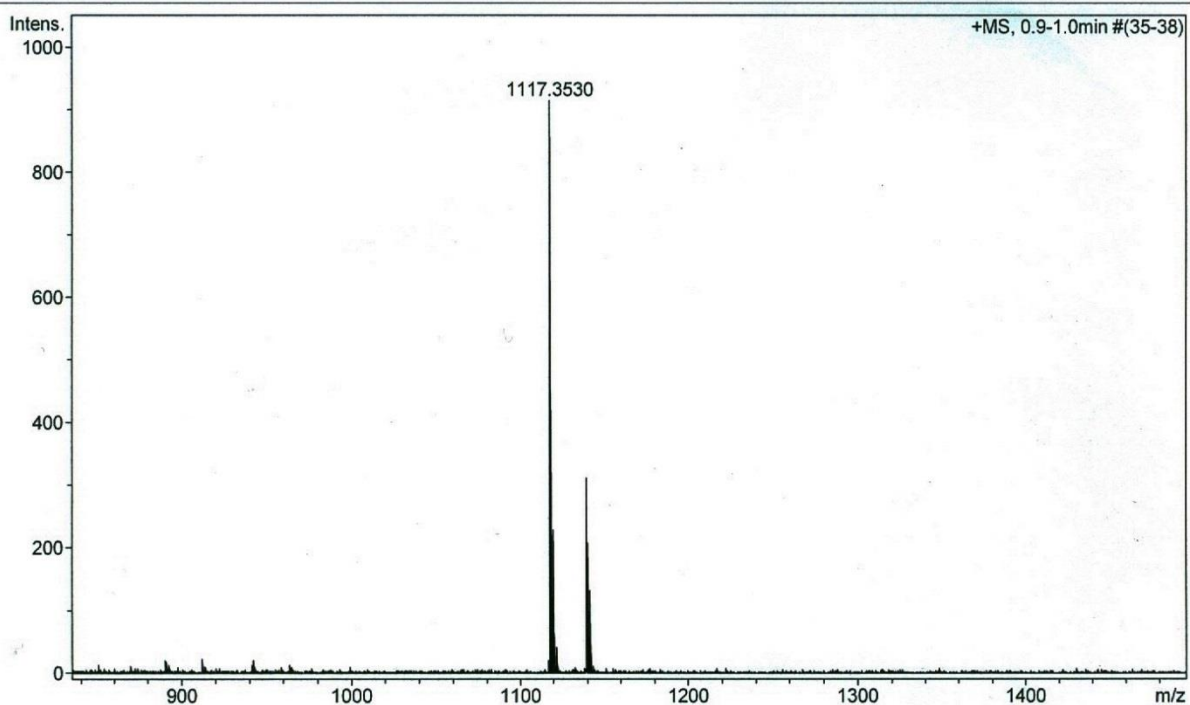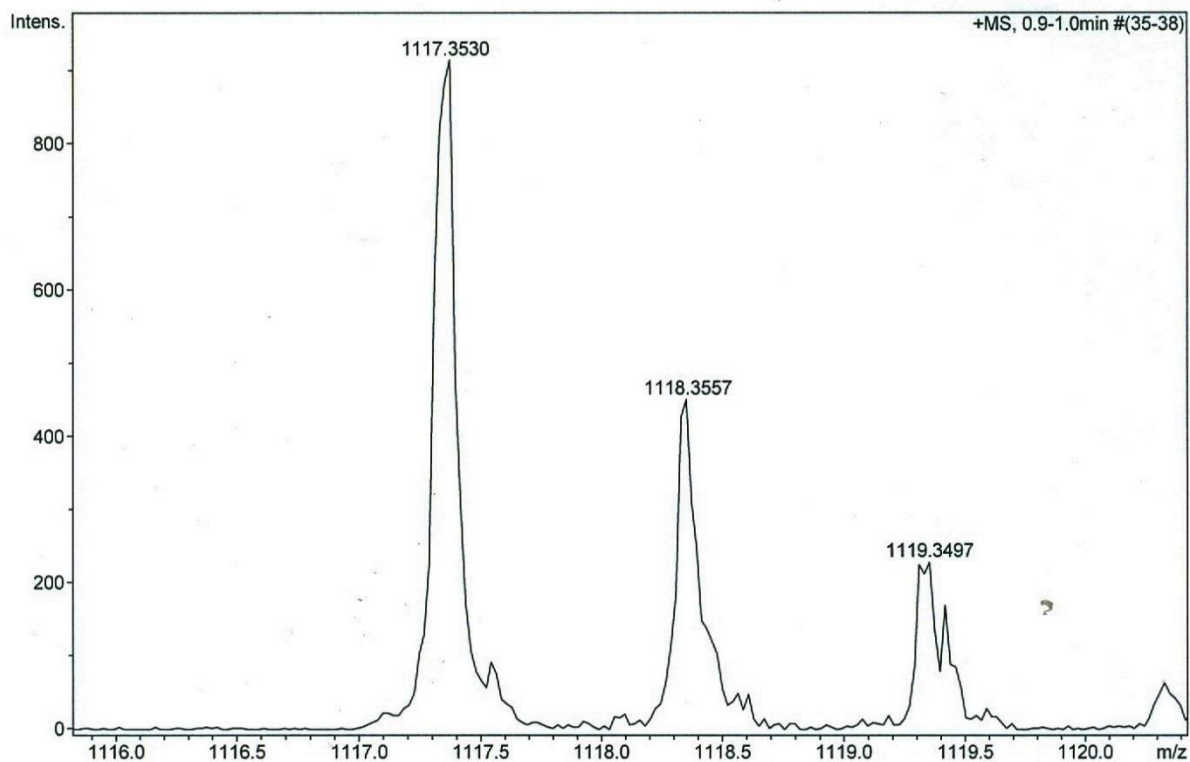

Figure S6: MS (ESI) spectrum of 2.

# Generic Display Report

## Analysis Info

Analysis Name D:\Data\Amit\April-Aug 2013\AJ-S-S-OH-pos-230513.d  
Method tune\_wide pos 12082011working.m  
Sample Name AJ-S-S-OH-pos-230513  
Comment

Acquisition Date 5/23/2013 10:48:59 AM

Operator Bruker07  
Instrument micrOTOF-Q

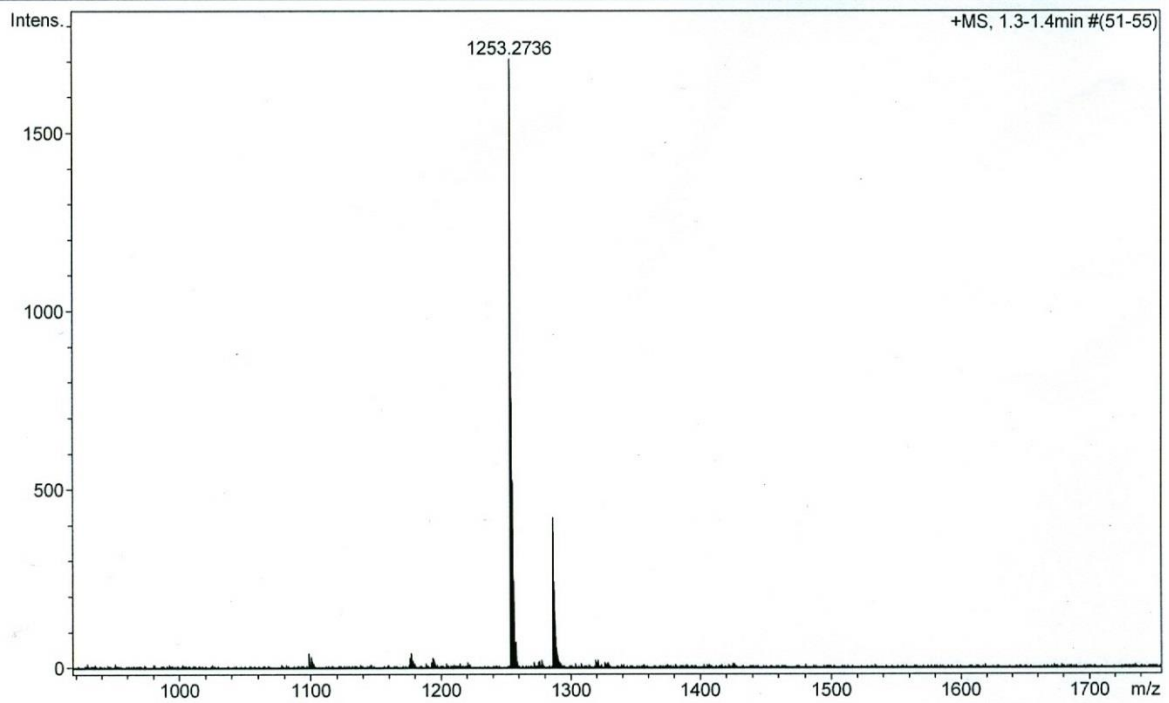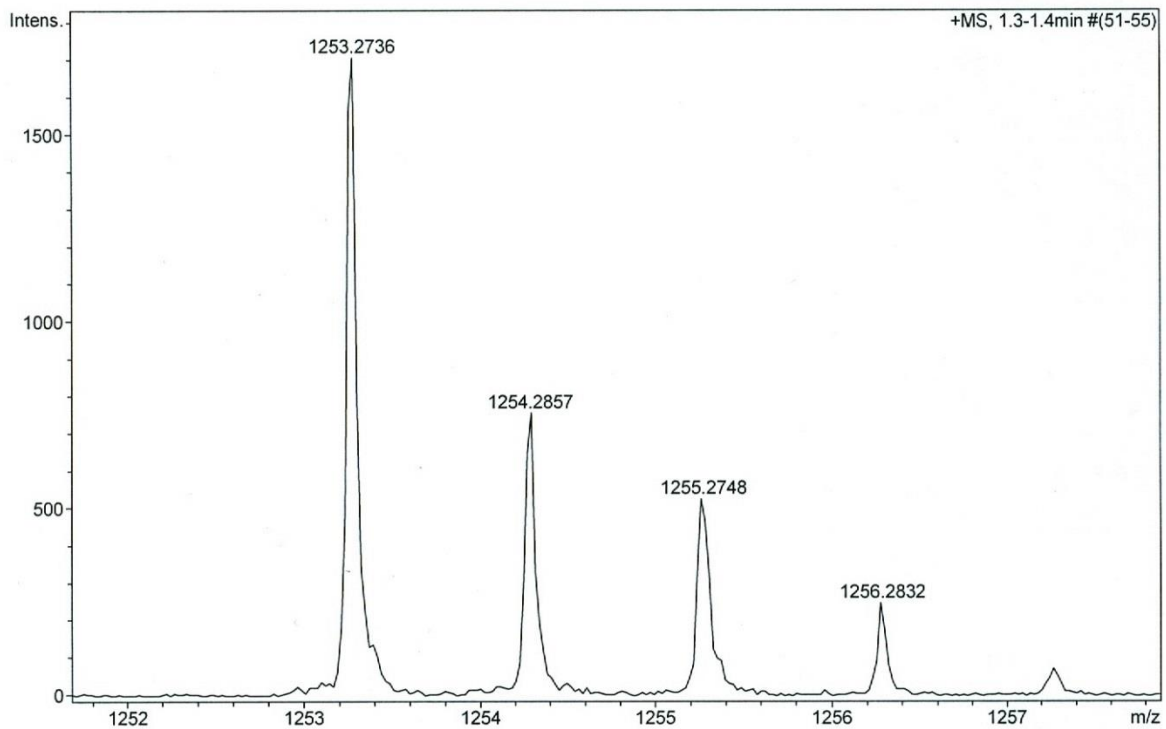

**Figure S7: MS (ESI) spectrum of 3.**



# Generic Display Report

## Analysis Info

Analysis Name D:\Data\Amit\AJ-SST-Neg-after-ppt-21012014.d  
Method oligometodi.m  
Sample Name AJ-SST-Neg-after-ppt-21012014  
Comment

Acquisition Date 1/21/2014 5:19:21 PM

Operator Bruker07  
Instrument micrOTOF-Q

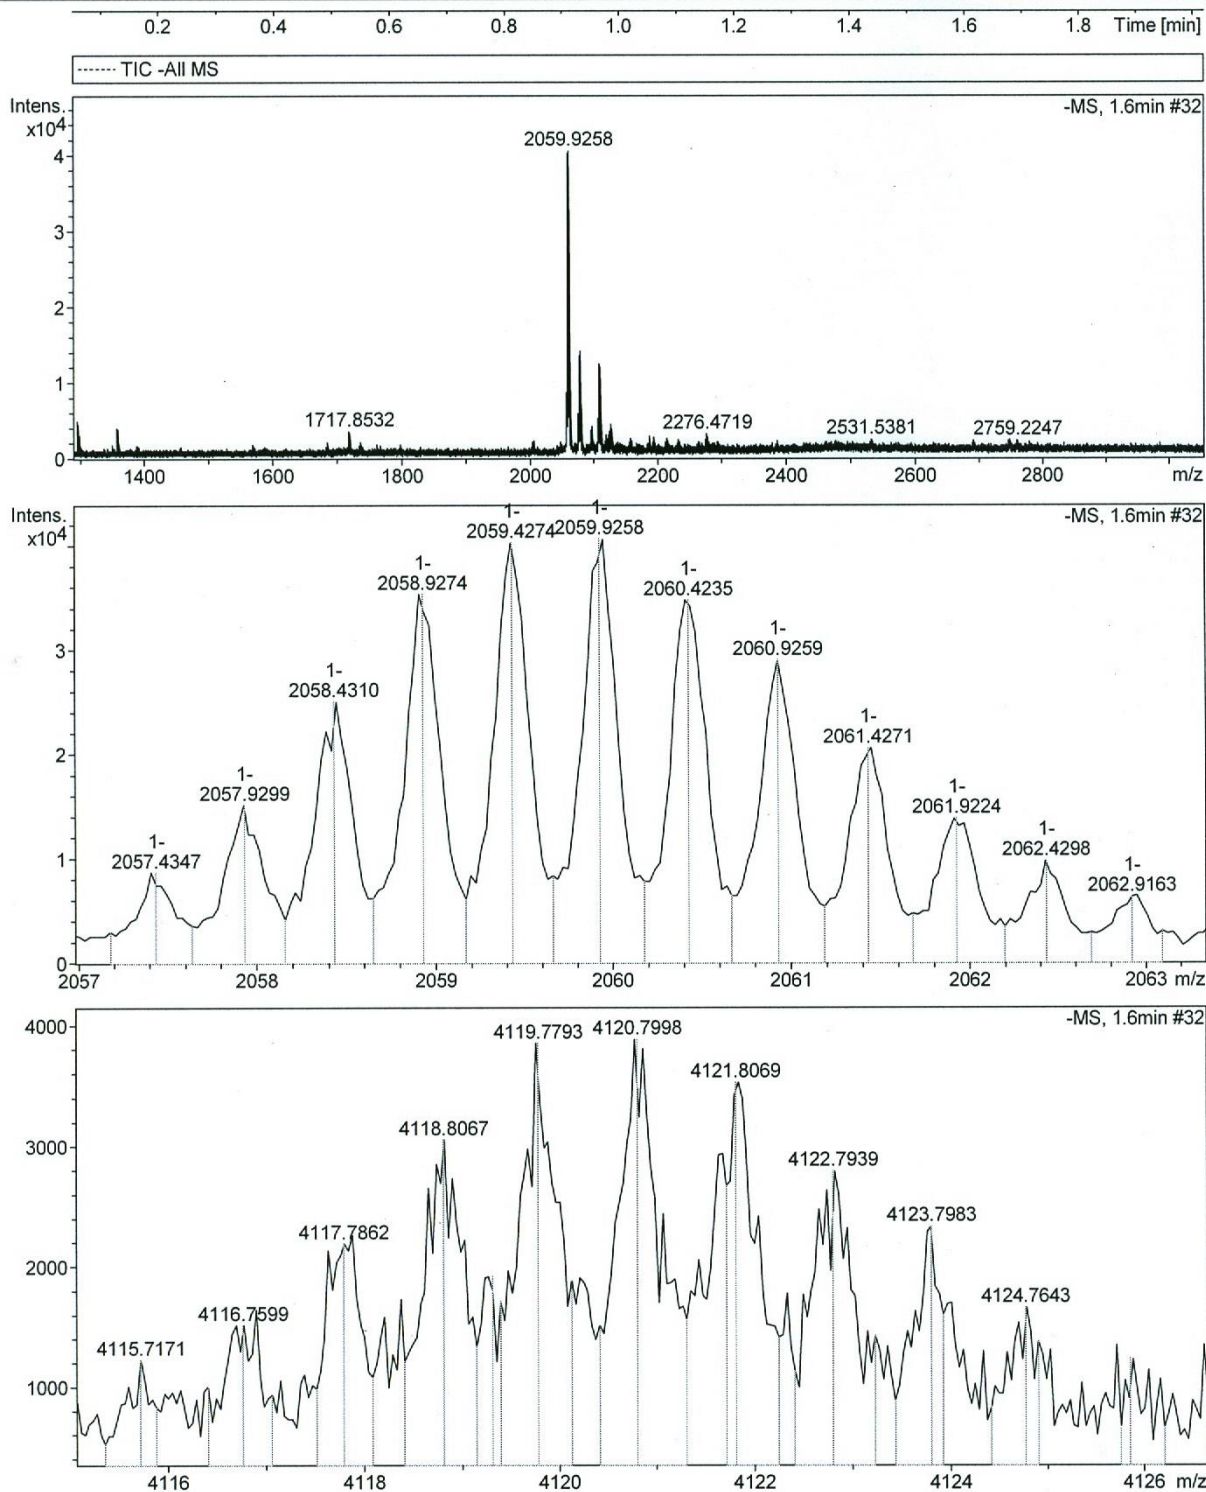

Figure S8: MS (ESI) spectrum of 7A.

# Generic Display Report

## Analysis Info

Analysis Name D:\Data\Amit\AJ-SSTOH-HPLC-20.91-neg-28012014.d  
Method oligometodi A.m  
Sample Name AJ-SSTOH-HPLC-20.91-neg-28012014  
Comment

Acquisition Date 1/28/2014 1:41:07 PM

Operator Bruker07  
Instrument micrOTOF-Q

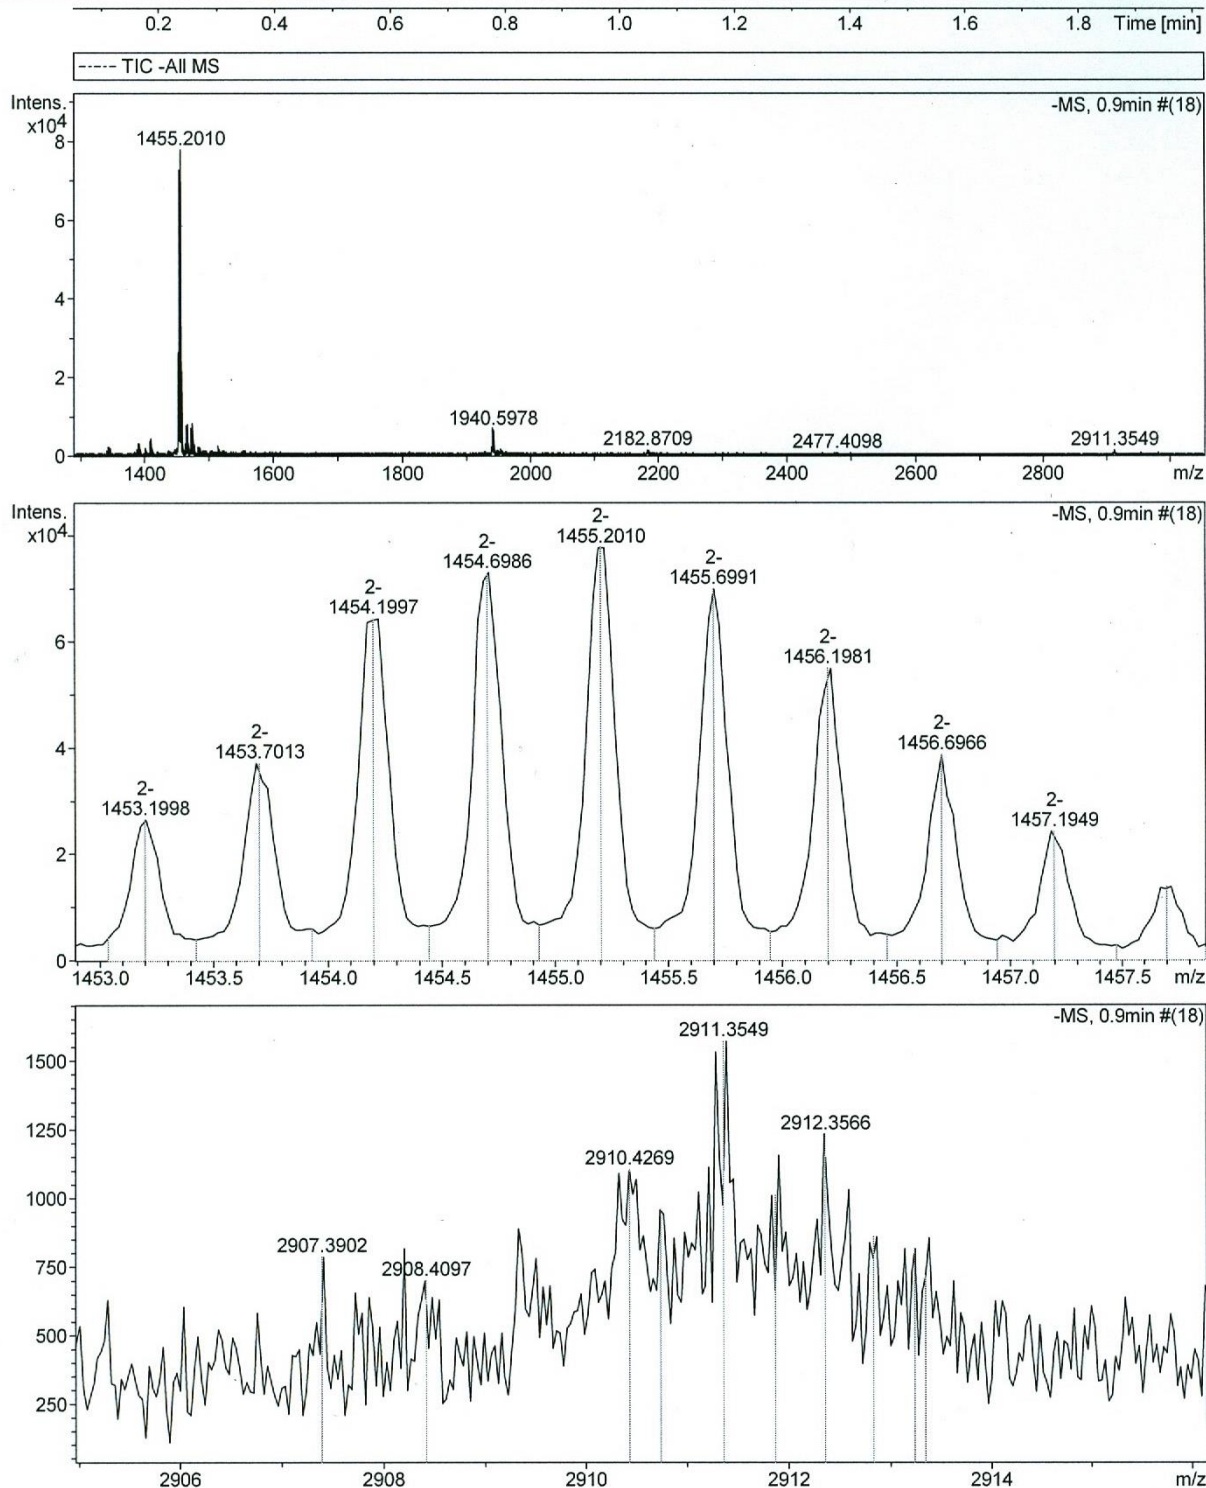

Figure S9: MS (ESI) spectrum of 7B.

# Generic Display Report

## Analysis Info

Analysis Name D:\Data\Amit\AJ-SSTCDMTr-HPLC-31.76-05022014-neg.d  
Method oligometodi.m  
Sample Name AJ-SSTCDMTr-HPLC-31.76-05022014-neg  
Comment

Acquisition Date 2/5/2014 10:49:56 AM

Operator Bruker07  
Instrument micrOTOF-Q

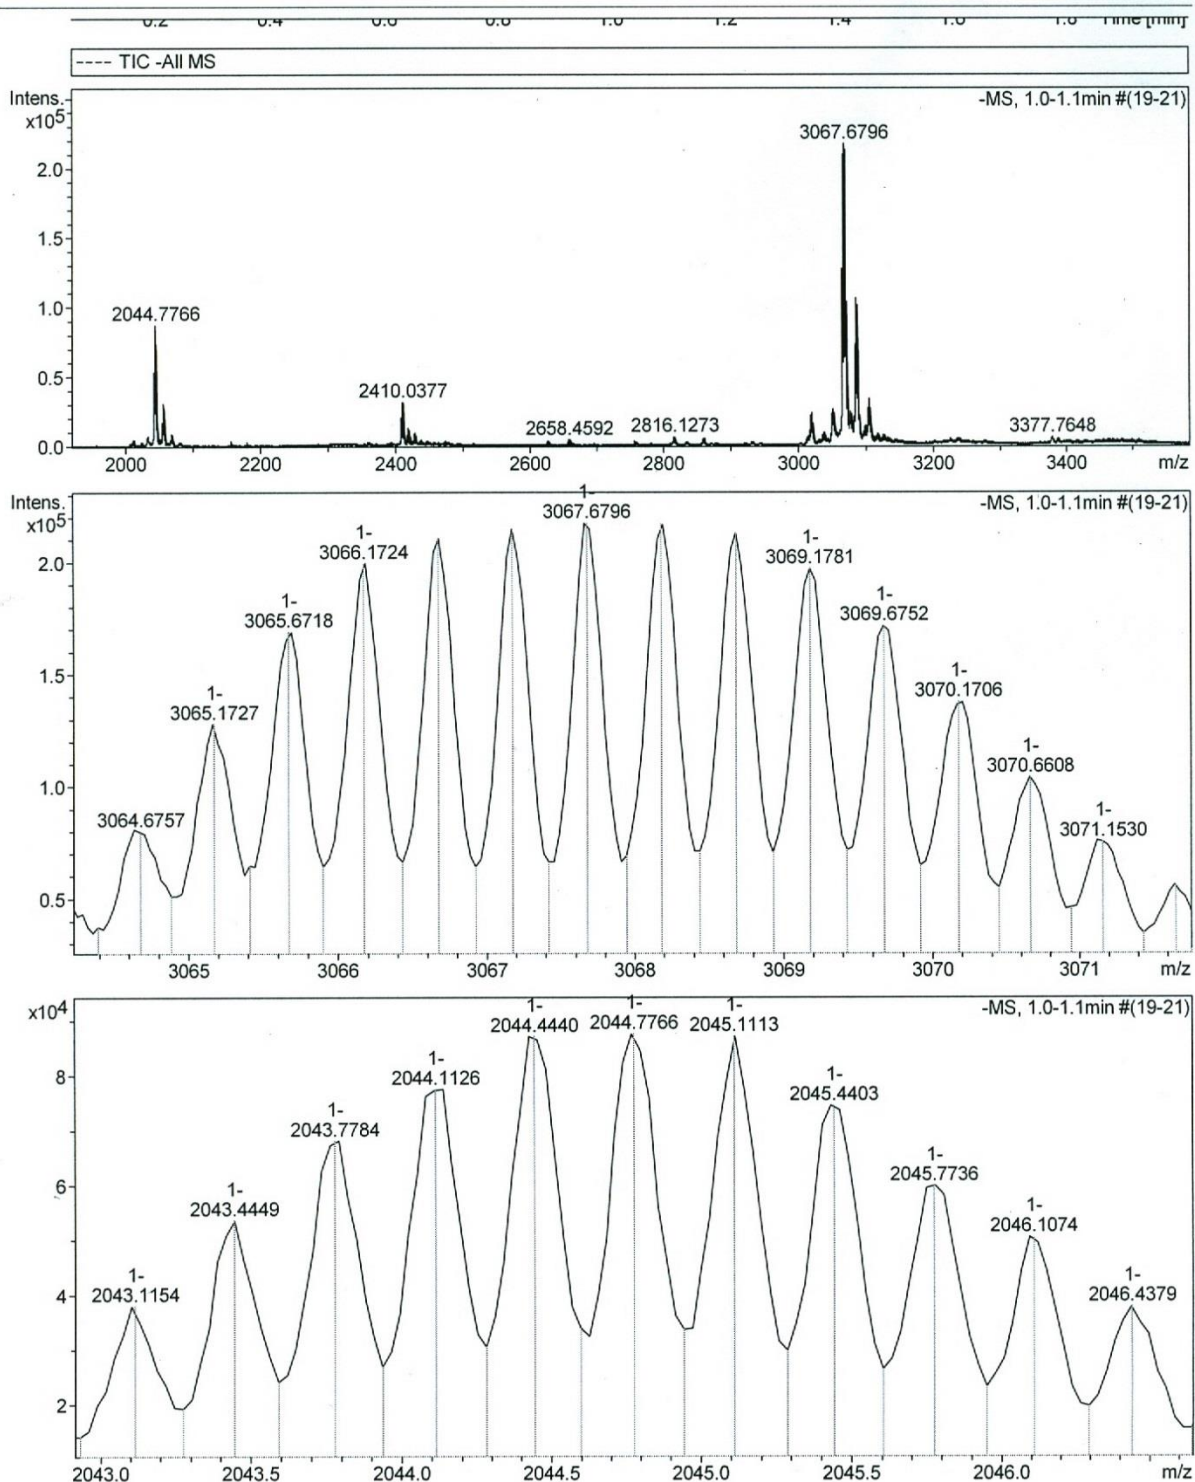

Figure S10: MS (ESI) spectrum of 8A.

# Generic Display Report

## Analysis Info

Analysis Name D:\Data\Amit\AJ-SSTCOH-HPLC-29.27min-07022014-neg.d  
Method oligometodi.m  
Sample Name AJ-SSTCOH-HPLC-29.27min-07022014-neg  
Comment

Acquisition Date 2/7/2014 5:36:51 PM

Operator Bruker07  
Instrument micrOTOF-Q

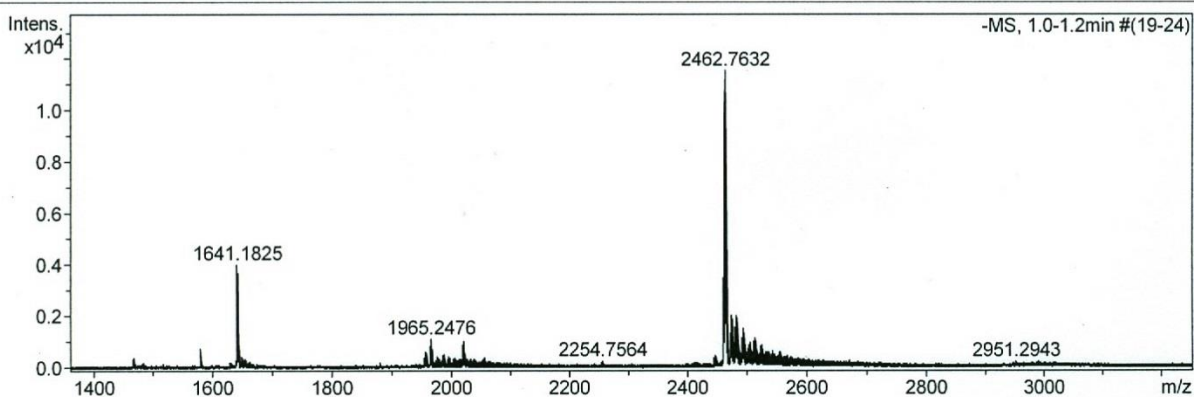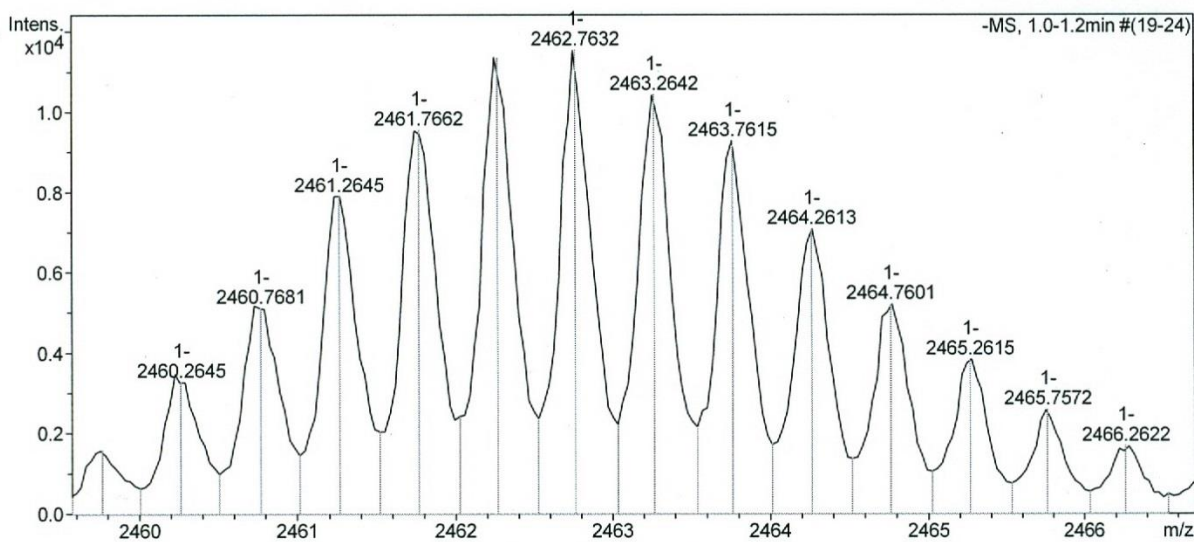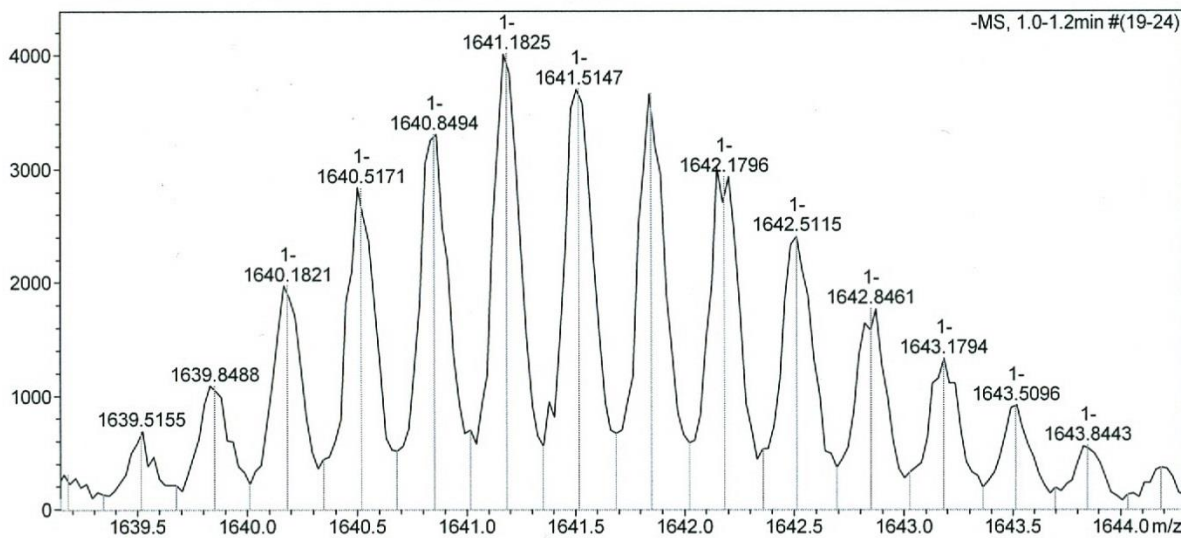

Figure S11: MS (ESI) spectrum of 8B.

# Generic Display Report

## Analysis Info

Analysis Name D:\Data\Amit\AJ-TCG-HPLC-30.1-min-neg-27022014.d  
Method oligometodi.m  
Sample Name AJ-TCG-HPLC-30.1-min-neg-27022014  
Comment

Acquisition Date 2/27/2014 2:06:08 PM

Operator Bruker07  
Instrument micrOTOF-Q

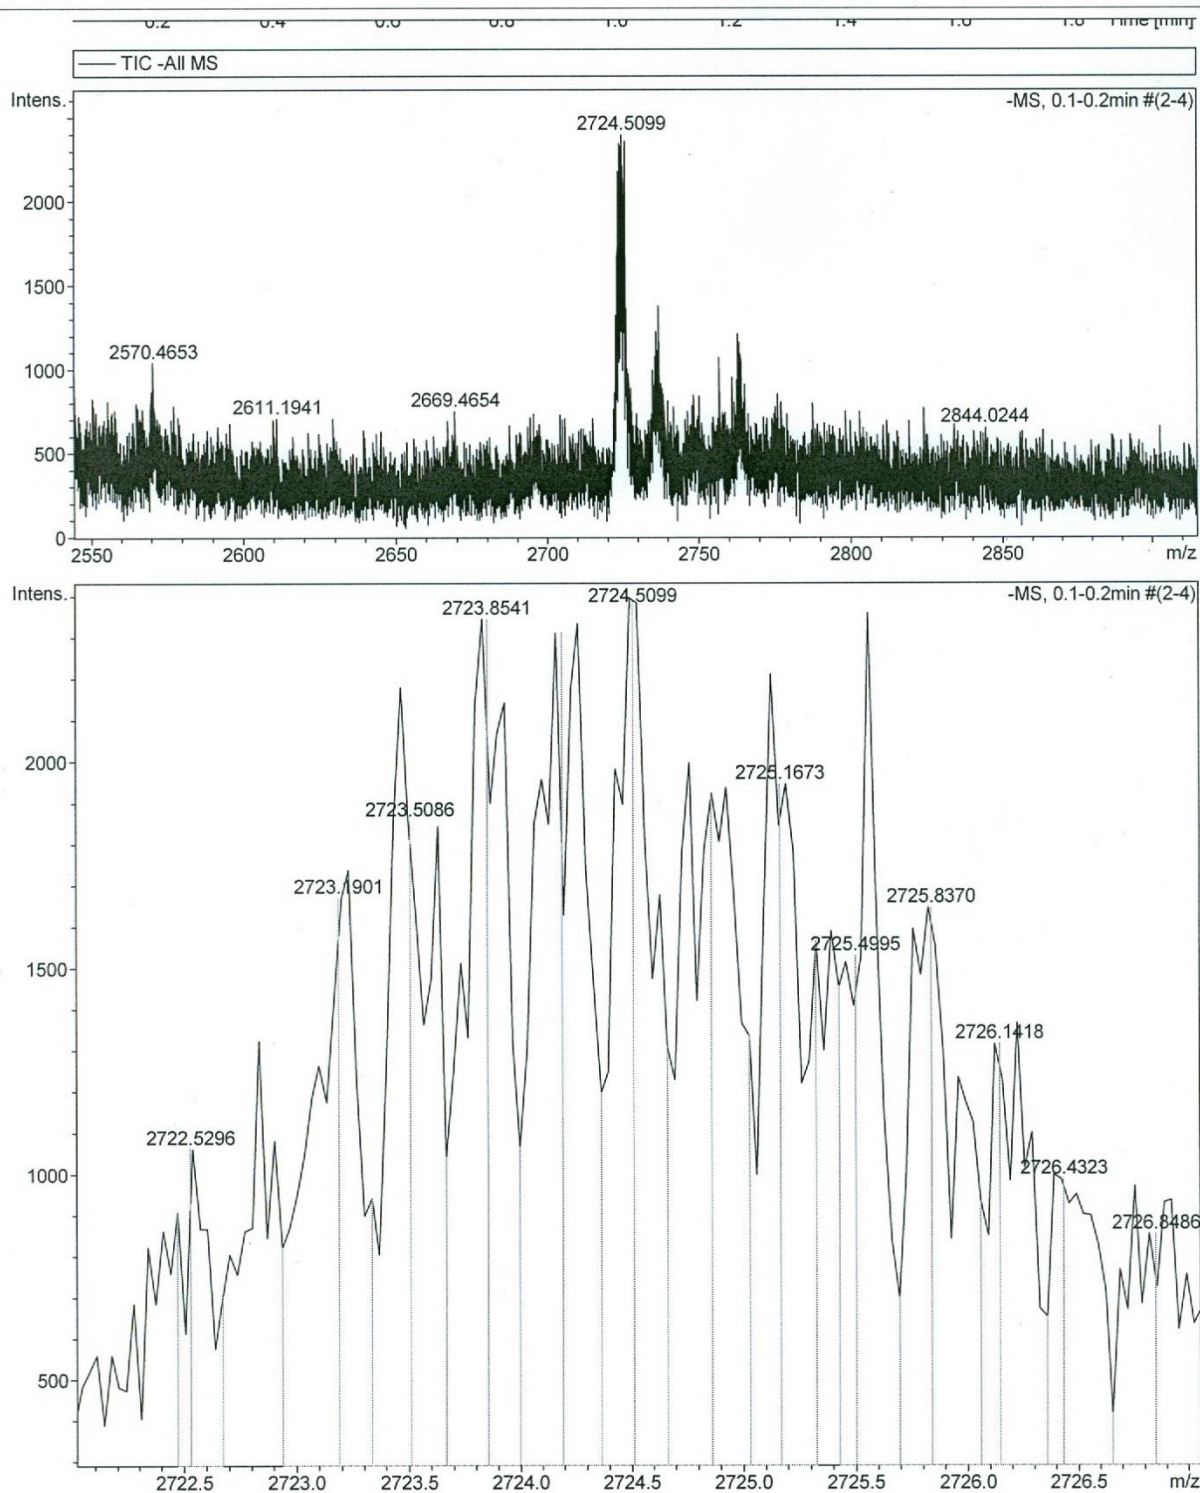

Figure S12: MS (ESI) spectrum of 9.

# Generic Display Report

## Analysis Info

Analysis Name D:\Data\Amit\AJ-TCG-HPLC-16.78.12062014-pos.d  
Method tune\_wide pos 12082011working.m  
Sample Name AJ-TCG-HPLC-16.78.12062014-pos  
Comment

Acquisition Date 6/12/2014 9:39:46 AM

Operator Bruker07  
Instrument micrOTOF-Q

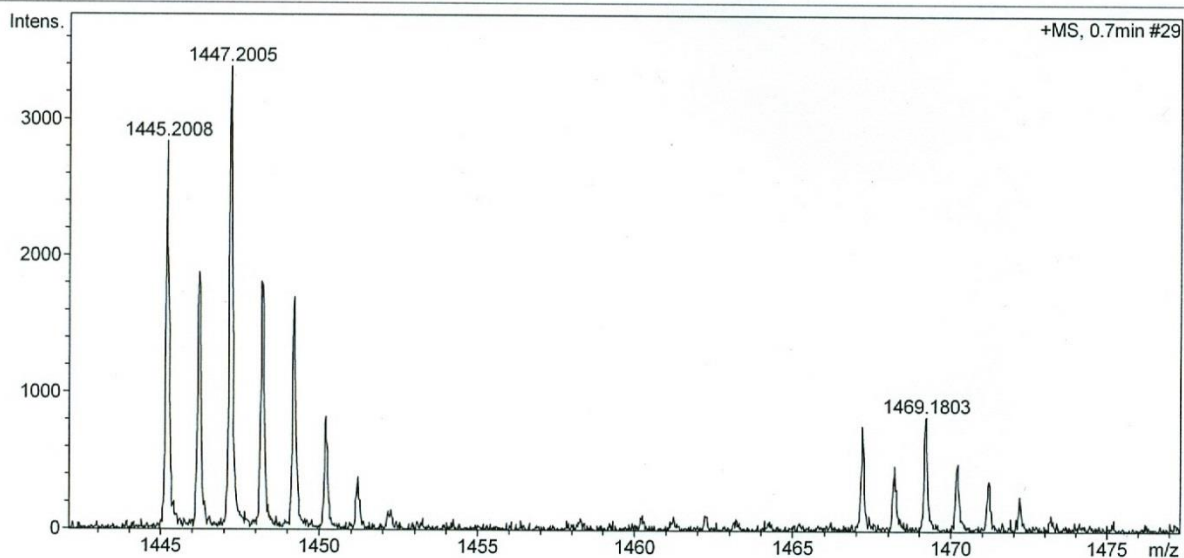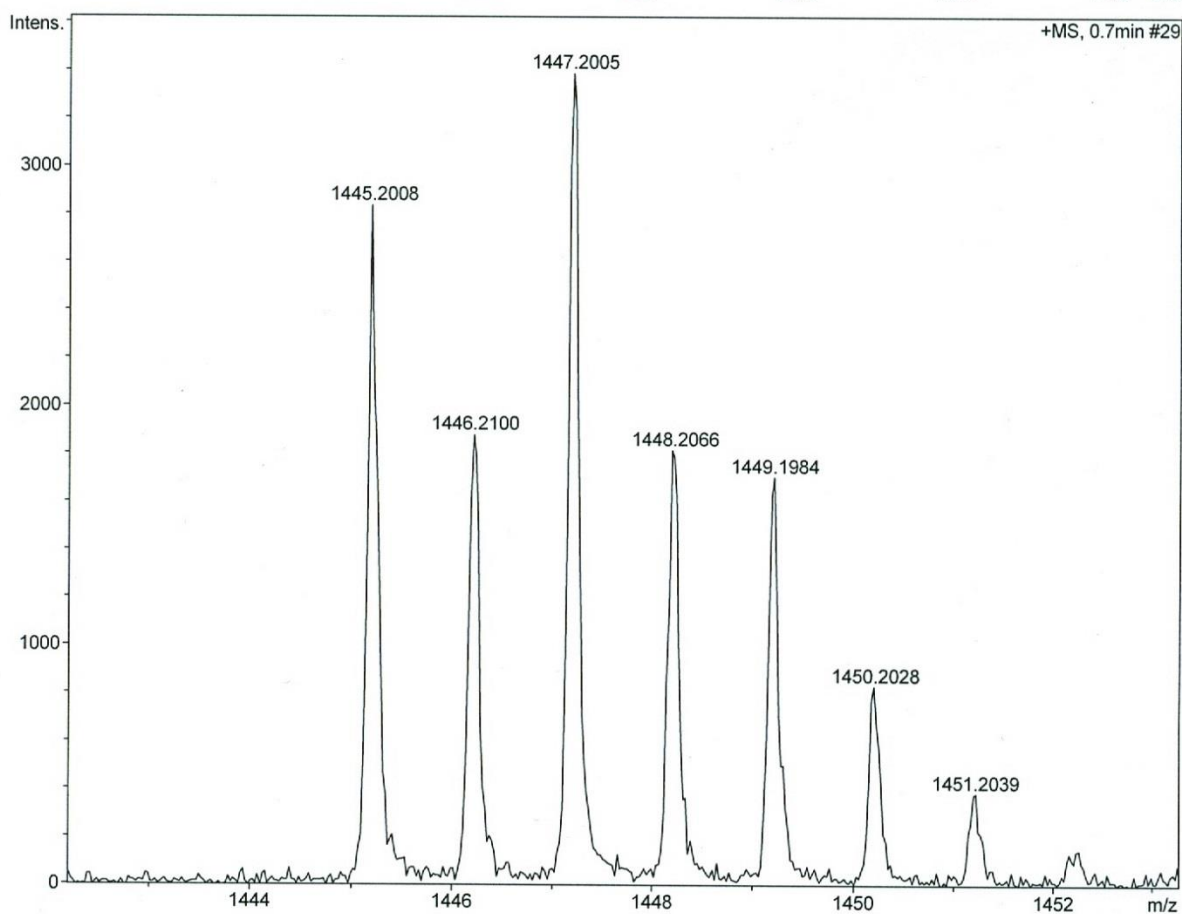

Figure S13: MS (ESI) spectrum of 10.
